# Supplementary figures and images for: Modulation of myeloid and T cells in vivo by Bruton’s tyrosine kinase inhibitor ibrutinib in patients with metastatic pancreatic ductal adenocarcinoma
Source: HighWire-hosted journal article supplement (doi:10.1136/jitc-2022-005425), 2023-01-01

## Supplementary Figure 7

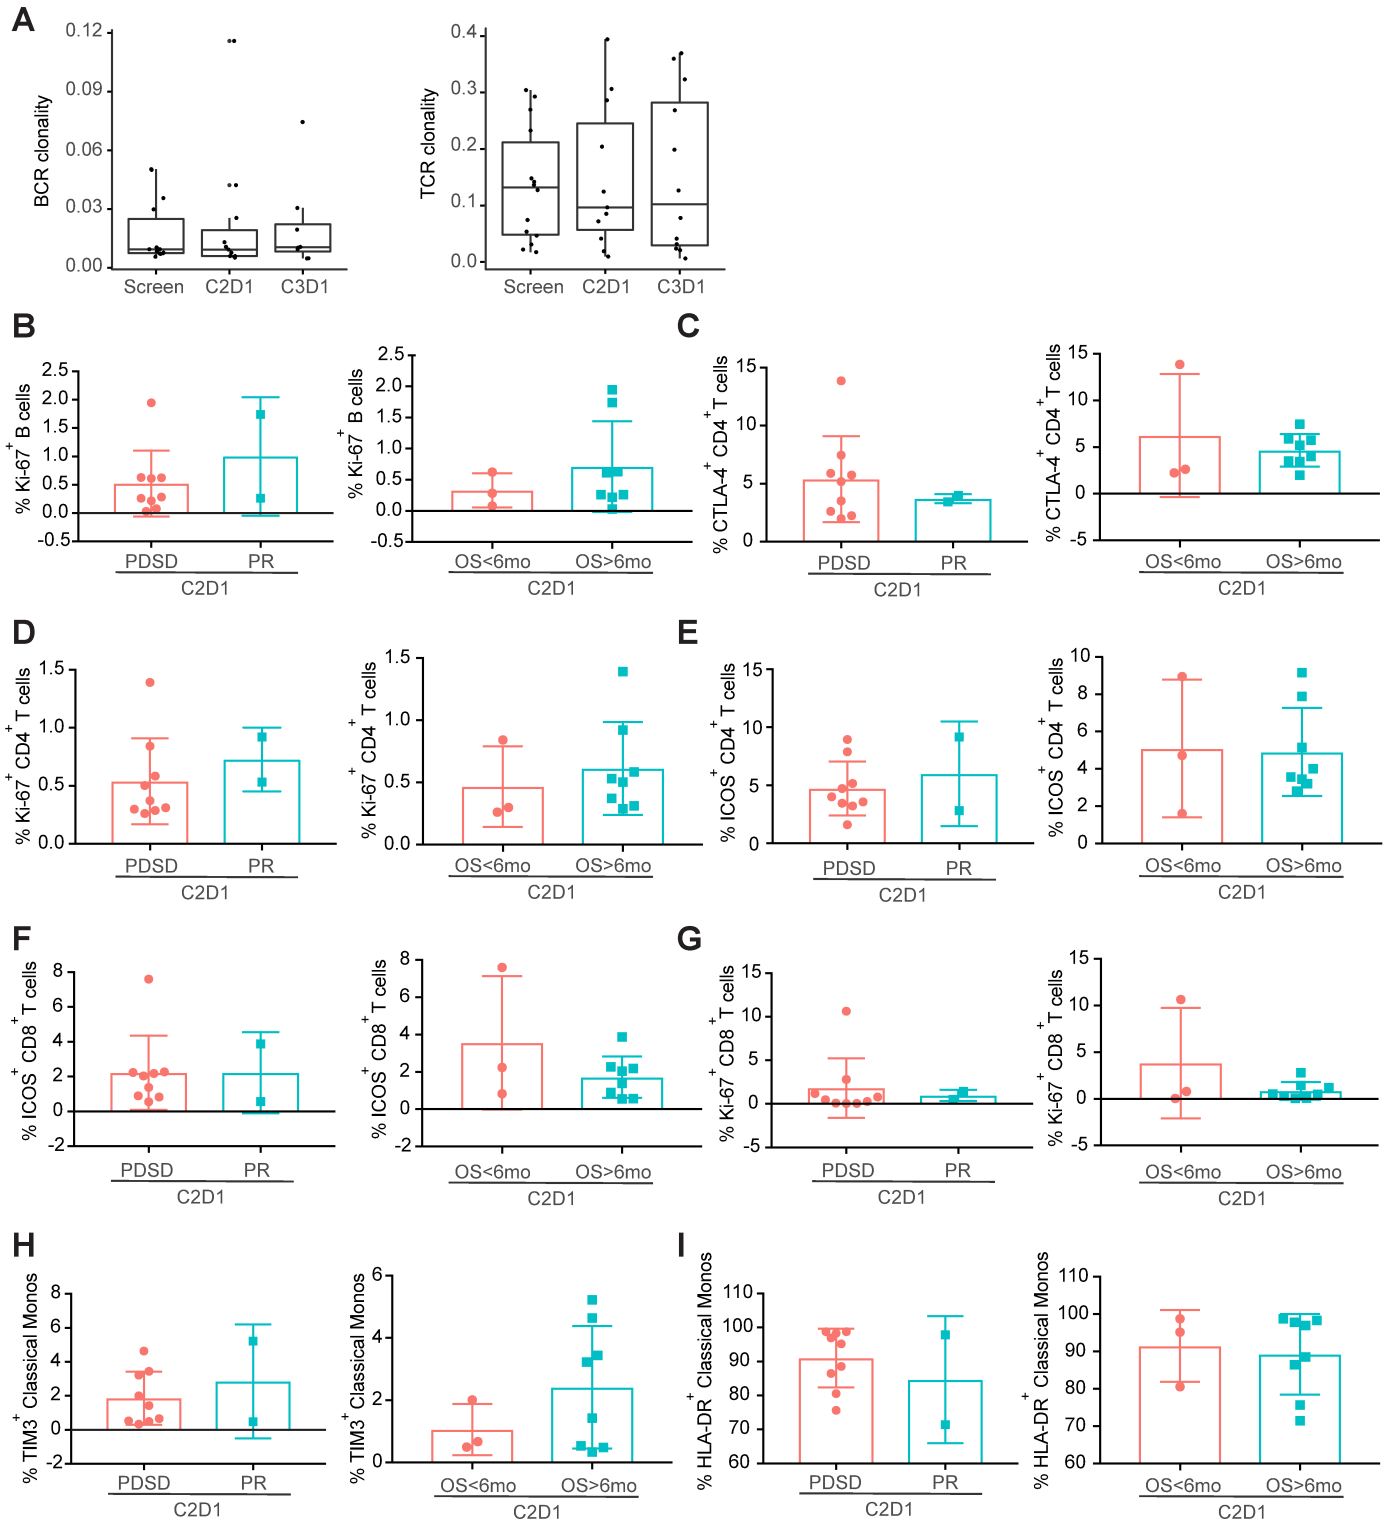

Supplement: jitc-2022-005425supp007_data_supplement.pdf [file jitc-2022-005425supp007_data_supplement.pdf]
